# Supplementary material
Source: Springer Nature journal article supplement (https://www.springermedizin.de/resource/supplementary/12997_2005_10_MOESM1_ESM.pdf/9623078)

**Cough score**  
(Leicester questionnaire)

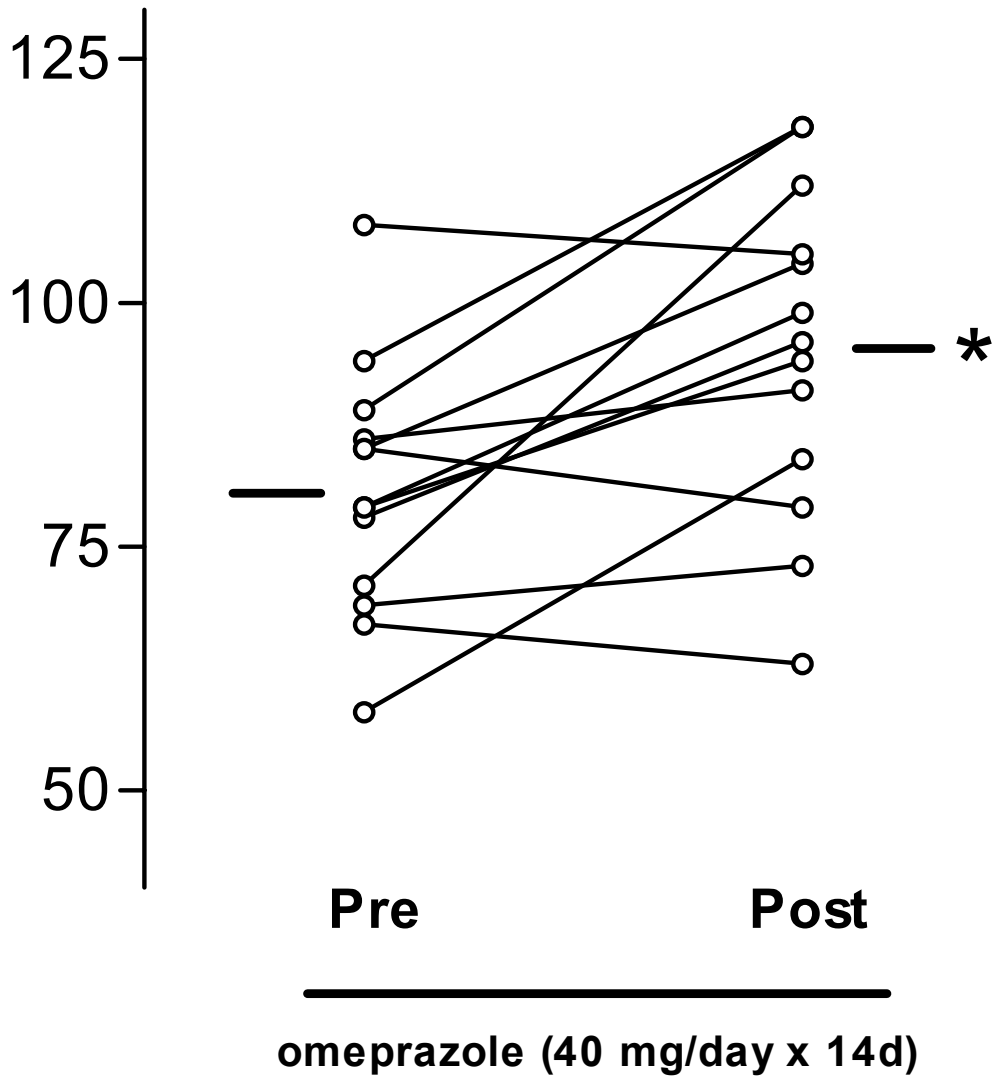

**Pre**

**Post**

**omeprazole (40 mg/day x 14d)**

Supplement: MOESM1 [file 9623078]
